# Supplementary material for: Rasch Model of the COVID-19 Symptom Checklist—A Psychometric Validation Study
Source: MDPI journal article supplement (doi:10.3390/v13091762), 2021-09-03

## Supplement

**Supplement Table S1.** Survey questions in German (original) and English.

| German (original)                                                                                                                    | English                                                                                                           |
|--------------------------------------------------------------------------------------------------------------------------------------|-------------------------------------------------------------------------------------------------------------------|
| <b>Bitte geben Sie Ihre aktuelle Körpertemperatur an.</b><br>Ich habe kein Fieber.<br>Ich habe eine erhöhte Körpertemperatur/Fieber. | <b>Please enter your current body temperature.</b><br>I have no fever.<br>I have a raised body temperature/fever. |
| <b>Ich fühle mich müde.</b><br>Ja<br>Nein<br>Kann ich nicht sagen                                                                    | <b>I feel tired.</b><br>Yes<br>No<br>Don't know                                                                   |
| <b>Ich habe Husten.</b><br>Ja<br>Nein<br>Kann ich nicht sagen                                                                        | <b>I have a cough.</b><br>Yes<br>No<br>Don't know                                                                 |
| <b>Ich habe Gliederschmerzen.</b><br>Ja<br>Nein<br>Kann ich nicht sagen                                                              | <b>I have aching limbs.</b><br>Yes<br>No<br>Don't know                                                            |
| <b>Ich habe Halsschmerzen.</b><br>Ja<br>Nein<br>Kann ich nicht sagen                                                                 | <b>I have a sore throat.</b><br>Yes<br>No<br>Don't know                                                           |
| <b>Ich habe Kopfweg.</b><br>Ja<br>Nein<br>Kann ich nicht sagen                                                                       | <b>I have a headache.</b><br>Yes<br>No<br>Don't know                                                              |
| <b>Ich fühle mich kurzatmig.</b><br>Ja<br>Nein<br>Kann ich nicht sagen                                                               | <b>I feel short of breath.</b><br>Yes<br>No<br>Don't know                                                         |
| <b>Ich habe Schüttelfrost.</b><br>Ja<br>Nein<br>Kann ich nicht sagen                                                                 | <b>I have chills.</b><br>Yes<br>No<br>Don't know                                                                  |
| <b>Ich habe Übelkeit und/oder Erbrechen.</b><br>Ja<br>Nein<br>Kann ich nicht sagen                                                   | <b>I have nausea and/or vomiting.</b><br>Yes<br>No<br>Don't know                                                  |
| <b>Ich habe Durchfall.</b><br>Ja<br>Nein<br>Kann ich nicht sagen                                                                     | <b>I have diarrhoea.</b><br>Yes<br>No<br>Don't know                                                               |
| <b>Ich habe eine verstopfte Nase.</b><br>Ja<br>Nein<br>Kann ich nicht sagen                                                          | <b>I have a nasal congestion.</b><br>Yes<br>No<br>Don't know                                                      |
| <b>Ich muss häufig niesen.</b><br>Ja<br>Nein<br>Kann ich nicht sagen                                                                 | <b>I have to sneeze a lot.</b><br>Yes<br>No<br>Don't know                                                         |
| <b>Ich habe Schnupfen.</b><br>Ja<br>Nein<br>Kann ich nicht sagen                                                                     | <b>I have a cold.</b><br>Yes<br>No<br>Don't know                                                                  |
| <b>Nehmen Sie eine Abnahme des Geschmacks und/oder des Geruchs wahr?</b><br>Ja<br>Nein<br>Kann ich nicht sagen                       | <b>Do you notice a decrease in taste and/or smell?</b><br>Yes<br>No<br>Don't know                                 |

**Supplement Table S2. Item fit statistics sorted in an ascending order according to item location in the data set with the questionnaires filled in by the participants for the first time.** The smallest (negative) item location of fatigue implies that it was the item with the highest likelihood to be affirmed, whereas fever showed the lowest likelihood. Only one item (item 3 cough) showed a fit residual below the threshold of -2.5 and a significant F-test which represented individual item misfit. Cough also had a significant chi-squared value which can be interpreted as misfit to the latent trait. The Bonferroni corrected significance level was 0.000667. Significances are highlighted in bold letters

| Item number | Description                    | Location | Standard error | Fit residual | F-stat | p-value       | ChiSq | p-value       |
|-------------|--------------------------------|----------|----------------|--------------|--------|---------------|-------|---------------|
| 2           | Fatigue                        | -2.21    | 0.07           | 1.01         | 0.34   | 0.9613        | 3.40  | 0.6386        |
| 13          | Sneezing                       | -1.67    | 0.07           | 5.29         | 3.34   | <b>0.0005</b> | 33.67 | <b>0.0000</b> |
| 12          | Nasal congestion               | -1.52    | 0.07           | -0.96        | 2.58   | 0.0061        | 23.59 | <b>0.0003</b> |
| 14          | Sniffles/rhinitis              | -1.03    | 0.08           | -2.93        | 3.27   | <b>0.0006</b> | 27.99 | <b>0.0000</b> |
| 7           | Headache                       | -0.91    | 0.08           | -0.86        | 1.82   | 0.0613        | 20.54 | 0.0010        |
| 3           | Cough                          | -0.63    | 0.09           | -4.58        | 2.72   | 0.0040        | 28.74 | <b>0.0000</b> |
| 6           | Soare throat                   | -0.18    | 0.10           | -1.33        | 0.47   | 0.8950        | 8.49  | 0.1312        |
| 5           | Pain in limbs                  | 0.10     | 0.11           | -1.41        | 1.19   | 0.2990        | 13.10 | 0.0225        |
| 15          | Smell and taste disorders      | 0.25     | 0.11           | -1.84        | 1.09   | 0.3644        | 12.13 | 0.0330        |
| 11          | Diarrhea                       | 0.33     | 0.12           | -0.28        | 0.82   | 0.5954        | 9.35  | 0.0961        |
| 4           | Dry cough/no sputum production | 0.37     | 0.12           | -3.85        | 4.06   | <b>0.0001</b> | 26.09 | <b>0.0001</b> |
| 8           | Shortness of breath            | 0.44     | 0.12           | -2.85        | 0.71   | 0.7016        | 9.72  | 0.0835        |
| 10          | Vomiting                       | 1.55     | 0.19           | -2.20        | 0.95   | 0.4849        | 7.97  | 0.1579        |
| 9           | Chills                         | 2.47     | 0.28           | -1.47        | 2.75   | 0.0036        | 15.80 | 0.0074        |
| 1           | Fever                          | 2.64     | 0.30           | 0.38         | 0.58   | 0.8132        | 6.12  | 0.2951        |

**Supplement Figure S1. Fatigue in each age group.** 1 refers to 0-9 Years (24% affirmed fatigue), 10-19 Years (65% fatigue), 20-29 Years (64% fatigue), 30-39 Years (67% fatigue), 40-49 Years (60% fatigue), 50-59 Years (49% fatigue), 60-69 Years (34% fatigue), 70-79 Years (20% fatigue), 80-89 Years (50% fatigue),  $\geq 90$  Years (100% fatigue).

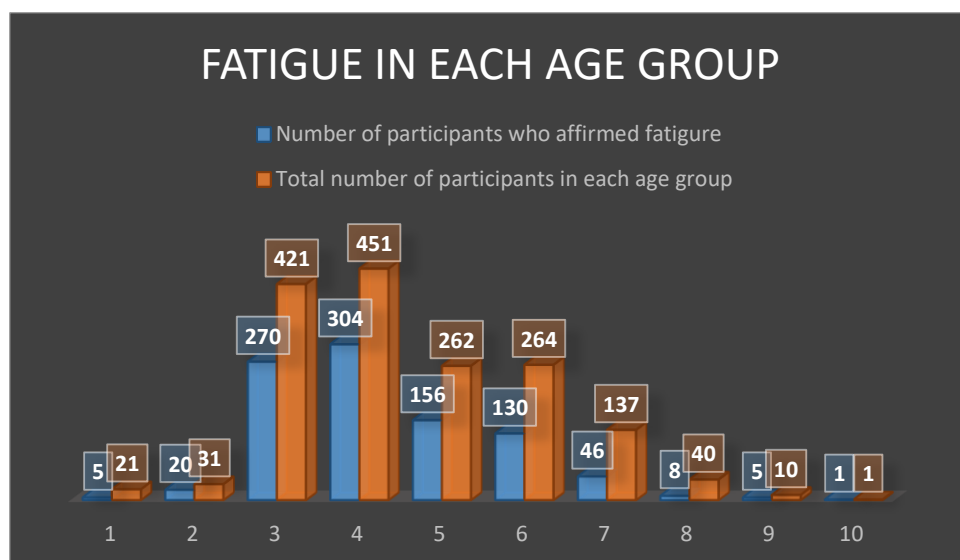

**Supplement Figure S2. Person-item map.** The grey bars in the top of the graph refer to the frequencies of the estimated levels of the COVID-19 symptoms of the participants (so-called person parameters). The black dot in each line represents the threshold between no symptom versus the experience of a specific symptom.

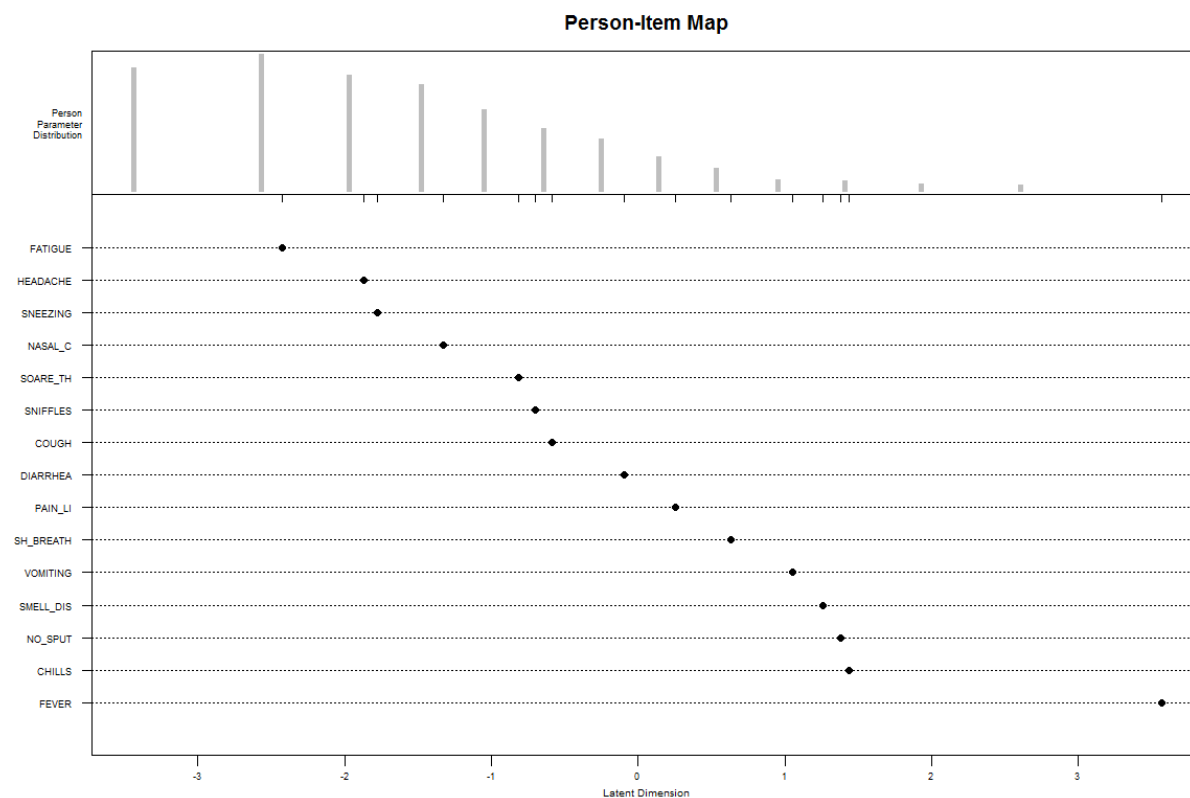

Supplement: s1 [file s1]
