# Supplementary material for: Rasch Model of the COVID-19 Symptom Checklist—A Psychometric Validation Study
Source: MDPI journal article supplement (doi:10.3390/v13091762), 2021-09-03
Supplement: s1 [file s1]

**Supplement Table S3. Calculation details of the transformations of raw scores into metric scales (logit scales and from zero to ten); ‘Diff’ refers to difference; ‘COM’ refers to persons with comorbidities; ‘IMM’ refers to persons with immunosuppressive medication.**

| All - no split |              |             | Item 7 - Headache - COM |             |             |             |       | Item 8 - Shortness of breath - COM |             |           |             |      | Item 5 - Pain in the limbs - IMM |             |             |             |      |
|----------------|--------------|-------------|-------------------------|-------------|-------------|-------------|-------|------------------------------------|-------------|-----------|-------------|------|----------------------------------|-------------|-------------|-------------|------|
| Raw score      | Metric scale | Zero to ten | No COM - logit          | Zero to ten | COM - logit | Zero to ten | Diff  | No COM logit                       | Zero to ten | COM logit | Zero to ten | Diff | No IMM - logit                   | Zero to ten | IMM - logit | Zero to ten | Diff |
| 0              | -4,02        | 0,55        | -3,95                   | 0,71        | -3,86       | 0,82        | -0,10 | -4,03                              | 0,53        | -4,05     | 0,49        | 0,04 | -3,95                            | 0,69        | -4,01       | 0,61        | 0,08 |
| 1              | -3,10        | 1,56        | -3,03                   | 1,71        | -2,94       | 1,82        | -0,10 | -3,11                              | 1,55        | -3,14     | 1,51        | 0,05 | -3,03                            | 1,70        | -3,11       | 1,60        | 0,09 |
| 2              | -2,40        | 2,34        | -2,33                   | 2,47        | -2,24       | 2,57        | -0,10 | -2,41                              | 2,33        | -2,45     | 2,27        | 0,05 | -2,33                            | 2,46        | -2,43       | 2,35        | 0,11 |
| 3              | -1,87        | 2,93        | -1,80                   | 3,05        | -1,72       | 3,14        | -0,09 | -1,88                              | 2,92        | -1,92     | 2,86        | 0,06 | -1,80                            | 3,04        | -1,91       | 2,91        | 0,13 |
| 4              | -1,42        | 3,43        | -1,34                   | 3,55        | -1,27       | 3,62        | -0,07 | -1,42                              | 3,43        | -1,48     | 3,35        | 0,08 | -1,35                            | 3,53        | -1,47       | 3,39        | 0,14 |
| 5              | -1,01        | 3,88        | -0,92                   | 4,00        | -0,87       | 4,06        | -0,06 | -1,00                              | 3,89        | -1,08     | 3,80        | 0,09 | -0,93                            | 3,98        | -1,07       | 3,83        | 0,16 |
| 6              | -0,62        | 4,31        | -0,53                   | 4,42        | -0,49       | 4,47        | -0,05 | -0,61                              | 4,32        | -0,70     | 4,22        | 0,11 | -0,55                            | 4,41        | -0,69       | 4,24        | 0,16 |
| 7              | -0,24        | 4,73        | -0,15                   | 4,83        | -0,12       | 4,87        | -0,03 | -0,23                              | 4,75        | -0,34     | 4,63        | 0,12 | -0,17                            | 4,82        | -0,31       | 4,66        | 0,16 |
| 8              | 0,13         | 5,15        | 0,22                    | 5,24        | 0,25        | 5,27        | -0,03 | 0,15                               | 5,17        | 0,03      | 5,04        | 0,13 | 0,21                             | 5,23        | 0,07        | 5,08        | 0,15 |
| 9              | 0,51         | 5,57        | 0,61                    | 5,66        | 0,62        | 5,68        | -0,02 | 0,54                               | 5,60        | 0,41      | 5,46        | 0,14 | 0,59                             | 5,64        | 0,46        | 5,51        | 0,14 |
| 10             | 0,91         | 6,01        | 1,00                    | 6,09        | 1,02        | 6,10        | -0,01 | 0,94                               | 6,04        | 0,81      | 5,90        | 0,14 | 0,99                             | 6,08        | 0,88        | 5,96        | 0,12 |
| 11             | 1,34         | 6,48        | 1,43                    | 6,55        | 1,44        | 6,56        | -0,01 | 1,37                               | 6,52        | 1,24      | 6,39        | 0,13 | 1,41                             | 6,54        | 1,32        | 6,45        | 0,09 |
| 12             | 1,82         | 7,02        | 1,92                    | 7,08        | 1,92        | 7,09        | -0,01 | 1,85                               | 7,06        | 1,74      | 6,94        | 0,12 | 1,90                             | 7,07        | 1,83        | 7,00        | 0,07 |
| 13             | 2,42         | 7,68        | 2,52                    | 7,73        | 2,52        | 7,73        | -0,01 | 2,45                               | 7,71        | 2,35      | 7,62        | 0,10 | 2,50                             | 7,72        | 2,44        | 7,67        | 0,05 |
| 14             | 3,28         | 8,63        | 3,38                    | 8,66        | 3,38        | 8,66        | 0,00  | 3,30                               | 8,66        | 3,23      | 8,60        | 0,06 | 3,35                             | 8,66        | 3,32        | 8,63        | 0,03 |
| 15             | 4,52         | 10,00       | 4,61                    | 10,00       | 4,61        | 10,00       | 0,00  | 4,51                               | 10,00       | 4,49      | 10,00       | 0,00 | 4,59                             | 10,00       | 4,57        | 10,00       | 0,00 |

| Item 7 - Headache - Gender |             |              |             |       | Item 14 - Rhinites/Sinffles - Gender |             |              |             |      | Item 2 - Fatigue - Edu Status |             |               |             |      |
|----------------------------|-------------|--------------|-------------|-------|--------------------------------------|-------------|--------------|-------------|------|-------------------------------|-------------|---------------|-------------|------|
| Female - logit             | Zero to ten | Male - logit | Zero to ten | Diff  | Female - logit                       | Zero to ten | Male - logit | Zero to ten | Diff | Below - logit                 | Zero to ten | Above - logit | Zero to ten | Diff |
| -3,98                      | 0,75        | -3,86        | 0,87        | -0,12 | -3,97                                | 0,72        | -4,01        | 0,68        | 0,04 | -3,72                         | 0,99        | -3,95         | 0,74        | 0,25 |
| -3,05                      | 1,74        | -2,94        | 1,86        | -0,12 | -3,05                                | 1,71        | -3,10        | 1,66        | 0,06 | -2,84                         | 1,94        | -3,02         | 1,74        | 0,19 |
| -2,35                      | 2,49        | -2,24        | 2,60        | -0,11 | -2,34                                | 2,47        | -2,40        | 2,41        | 0,07 | -2,17                         | 2,66        | -2,31         | 2,51        | 0,15 |
| -1,81                      | 3,07        | -1,72        | 3,16        | -0,10 | -1,81                                | 3,05        | -1,88        | 2,97        | 0,08 | -1,67                         | 3,20        | -1,77         | 3,09        | 0,11 |
| -1,35                      | 3,56        | -1,27        | 3,64        | -0,08 | -1,35                                | 3,54        | -1,43        | 3,46        | 0,08 | -1,24                         | 3,67        | -1,31         | 3,58        | 0,08 |
| -0,93                      | 4,00        | -0,87        | 4,07        | -0,07 | -0,94                                | 3,99        | -1,02        | 3,90        | 0,09 | -0,84                         | 4,09        | -0,90         | 4,03        | 0,06 |
| -0,54                      | 4,42        | -0,49        | 4,48        | -0,05 | -0,55                                | 4,41        | -0,62        | 4,33        | 0,08 | -0,47                         | 4,50        | -0,51         | 4,45        | 0,05 |
| -0,16                      | 4,83        | -0,12        | 4,87        | -0,04 | -0,17                                | 4,82        | -0,24        | 4,74        | 0,08 | -0,10                         | 4,89        | -0,13         | 4,86        | 0,03 |
| 0,22                       | 5,24        | 0,25         | 5,27        | -0,03 | 0,20                                 | 5,22        | 0,14         | 5,16        | 0,06 | 0,27                          | 5,29        | 0,25          | 5,26        | 0,03 |
| 0,61                       | 5,65        | 0,63         | 5,67        | -0,02 | 0,58                                 | 5,63        | 0,53         | 5,58        | 0,05 | 0,64                          | 5,70        | 0,63          | 5,68        | 0,02 |
| 1,01                       | 6,07        | 1,02         | 6,09        | -0,02 | 0,98                                 | 6,06        | 0,94         | 6,01        | 0,04 | 1,04                          | 6,12        | 1,02          | 6,11        | 0,01 |
| 1,44                       | 6,53        | 1,45         | 6,55        | -0,01 | 1,41                                 | 6,51        | 1,37         | 6,48        | 0,03 | 1,46                          | 6,58        | 1,45          | 6,57        | 0,01 |
| 1,92                       | 7,06        | 1,93         | 7,06        | -0,01 | 1,89                                 | 7,04        | 1,87         | 7,01        | 0,02 | 1,94                          | 7,10        | 1,94          | 7,09        | 0,01 |
| 2,53                       | 7,70        | 2,54         | 7,71        | -0,01 | 2,49                                 | 7,69        | 2,48         | 7,67        | 0,02 | 2,54                          | 7,74        | 2,54          | 7,74        | 0,00 |
| 3,41                       | 8,64        | 3,41         | 8,64        | 0,00  | 3,37                                 | 8,63        | 3,36         | 8,62        | 0,01 | 3,40                          | 8,67        | 3,40          | 8,67        | 0,00 |
| 4,68                       | 10,00       | 4,68         | 10,00       | 0,00  | 4,64                                 | 10,00       | 4,63         | 10,00       | 0,00 | 4,63                          | 10,00       | 4,63          | 10,00       | 0,00 |
